# Supplementary material
Source: Springer Nature journal article supplement (https://www.springermedizin.de/resource/supplementary/13049_2013_714_MOESM2_ESM.pdf/9666954)
Supplement: MOESM2 [file 9666954]

**Table 1: Reviewed articles for tissue interface pressure**

| Reference                                | Country   | Article Type & Subjects                       | Observations Measurements                                                           | Key Findings                                                                                                                                                      | Weaknesses                                                                                                                          |
|------------------------------------------|-----------|-----------------------------------------------|-------------------------------------------------------------------------------------|-------------------------------------------------------------------------------------------------------------------------------------------------------------------|-------------------------------------------------------------------------------------------------------------------------------------|
| Jacobsen et al., 2008 <sup>5</sup>       | USA       | Literature review                             | Reduction in occipital pressure ulcers                                              | Improved nursing education and a variety of collars caused an reduction in occipital ulcer incidence                                                              | Only looked at their own trauma centre                                                                                              |
| Liew et al., 1994 <sup>13</sup>          | Australia | Case review: 2 patients                       | Pressure ulcer development                                                          | Ulceration is a complication of hard collar use                                                                                                                   | Only looked at 2 patients                                                                                                           |
| Murphy et al., 1997 <sup>14</sup>        | USA       | Case review: 1 patient                        | Pressure ulcer development                                                          | Occipital pressure ulcers after collar use are common; improved wound care/more suitable collars advised                                                          | Only one patient reviewed                                                                                                           |
| Walker, 2012 <sup>4</sup>                | UK        | Retrospective analysis: 90 patients           | Pressure ulcer development                                                          | Cervically immobilised patients have an increased risk of developing pressure ulcers                                                                              | Looked at all types of immobilisation not just semi-rigid collars                                                                   |
| Powers, 1997 <sup>20</sup>               | USA       | Retrospective analysis                        | Pressure ulcer development                                                          | Improved education, more suitable collars plus early collar removal protocol resulted in a ulcer reduction                                                        | Only looked at their own trauma centre                                                                                              |
| Blaylock, 1996 <sup>19</sup>             | USA       | Retrospective analysis and study: 20 patients | Pressure ulcer development                                                          | Improved education on skin condition/wound care and collar fitting, plus a new collar design resulted in no ulcers in the subjects.                               | Possibility that the team were conscious regarding ulcer development.. Small sample size and only one trauma centre included        |
| Molano et al., 2004 <sup>15</sup>        | Spain     | Retrospective study: 92 patients              | Pressure ulcer development                                                          | 23.9% had ulcers; with occipital ulcers being more problematic to treat                                                                                           | Only looked at their own unit                                                                                                       |
| Chendrasekhar et al., 1998 <sup>21</sup> | USA       | Retrospective study: 52 patients              | Pressure ulcer development                                                          | Ulceration is related to duration of collar wear; early collar removal advocated                                                                                  | Only 34 patients actually included due to mortality and only 8 had their collar removed earlier than normal                         |
| Beavis, 1989 <sup>17</sup>               | UK        | Study:10 volunteers, 4 collars                | Tissue Interface Pressure at chin and occiput (25-172mmHg)                          | Passive and active results showed wide variance, but Beavis felt that the pressure was a positive feature, being an incentive not to move                         | No consideration for the impact of high interface pressure                                                                          |
| Black et al., 1998 <sup>22</sup>         | USA       | Study: 20 volunteers, 2 collars               | Tissue Interface Pressure at occiput (39-83mmHg) plus skin temperature and humidity | No difference between the interface pressures of the collars was found; felt skin humidity was an important factor in ulcer development                           | Collars were worn for up to 30 minutes possibly impacting on pressure readings due to foam compression within the collar            |
| Ferguson et al, 1993 <sup>10</sup>       | UK        | Study: 5 patients, 6 collars                  | Tissue Interface Pressure around neck area (1.2-11.8mmHg)                           | Pressures recorded depended on the tightness of the collar                                                                                                        | Sensor positions were possibly not indicative of true pressure points; tensions applied were subjective                             |
| Fisher, 1978 <sup>16</sup>               | USA       | Study: 8 patients, 1 collar                   | Tissue Interface Pressure at chin and occiput (25-105mmHg)                          | Passive interface pressures varied with collar tightness:                                                                                                         | Used the same person to apply the collar; 'tightness' was subjective                                                                |
| Plaisier et al., 1994 <sup>18</sup>      | USA       | Study: 20 volunteers, 4 collars               | Tissue Interface Pressure at chin, occiput and mandible (27-57mmHg); plus comfort   | Philadelphia/Stifneck collars exceed capillary closing pressure in some positions, yet Newport/Miami J did not; comfort ratings tallied with this                 | Skin humidity temperature data would have confirmed their 'skin friendly' endorsement of the Newport and Miami J collar             |
| Tescher et al., 2007 <sup>23</sup>       | USA       | Study: 48 patients, 4 collars                 | Tissue Interface Pressure at occiput and mandible                                   | Miami J/ Miami J with Occian back had lower pressures recorded both seated and supine; however all maximal pressures recorded exceeded capillary closing pressure | Admit that interface pressure is an important consideration in ulcer development but admit other factors may play an important part |
